# Supplementary material for: Discriminative ‘turn-on’ fluorescence sensing of volatile halogenated solvents using a cleft-shaped 4-amino-1,8-naphthalimide Tröger's base fluorophore
Source: Royal Society of Chemistry journal article supplement (doi:10.1039/d2sd00177b), 2022-12-29
Supplement: d2sd00177b1.pdf [file d2sd00177b1.pdf]

## Supporting Information

### Discriminative 'turn-on' fluorescent sensing of volatile halogenated solvents using a cleft-shaped 4-amino-1,8-naphthalimide Tröger's base fluorophore

Binduja Mohan, Deivasigamani Umadevi, and Sankarasekaran Shanmugaraju\*

Department of Chemistry, Indian Institute of Technology Palakkad, Palakkad-678557, Kerala, India. E-mail: [shanmugam@iitpkd.ac.in](mailto:shanmugam@iitpkd.ac.in)

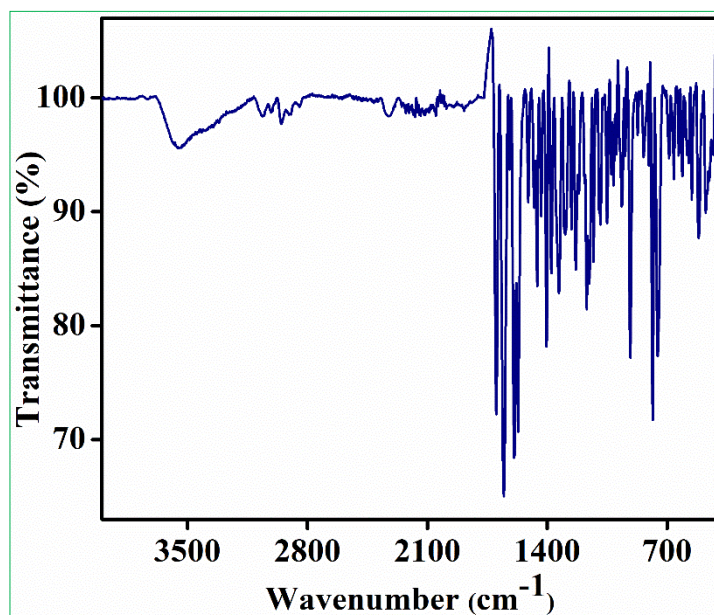

Fig. S1. FT-IR spectrum of TBNap.

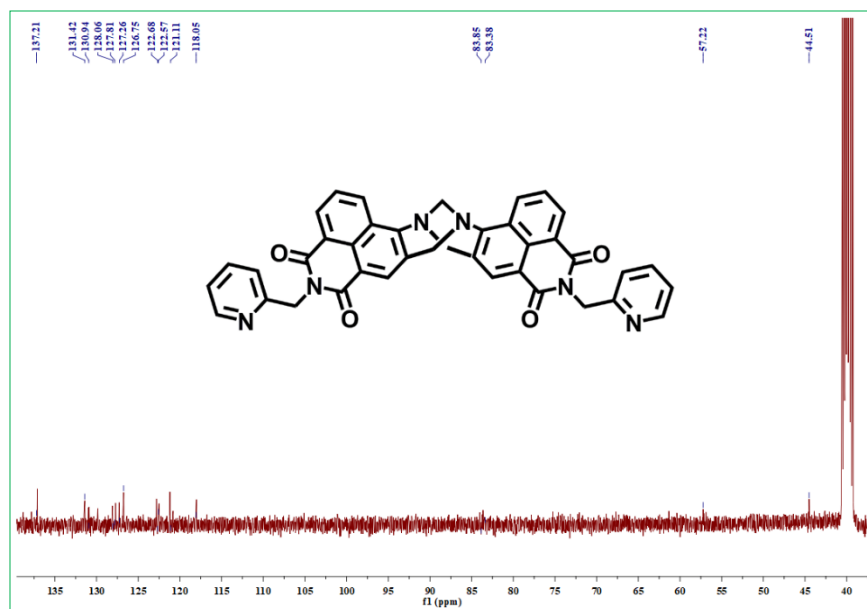

**Fig. S2.**  $^{13}\text{C}$  NMR spectrum of **TBNap** (400 MHz,  $\text{DMSO-d}_6$ ). Several attempts were made to obtain well resolved and high-intensity spectrum of the **TBNap** sensor. However, an increase in the concentration of **TBNap** in the  $\text{DMSO}$  medium was found to be precipitating/aggregating after a few minutes of preparing the NMR sample. Therefore, we were unable to produce a high-quality  $^{13}\text{C}$  NMR spectrum. Nevertheless,  $^1\text{H}$  NMR and HRMS unambiguously confirm the formation and purity of **TBNap**.

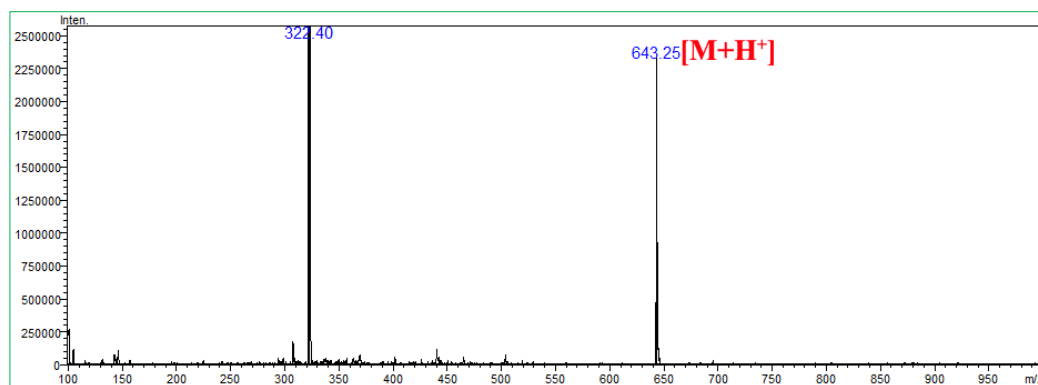

**Fig. S3.** HRMS Spectrum of **TBNap**.

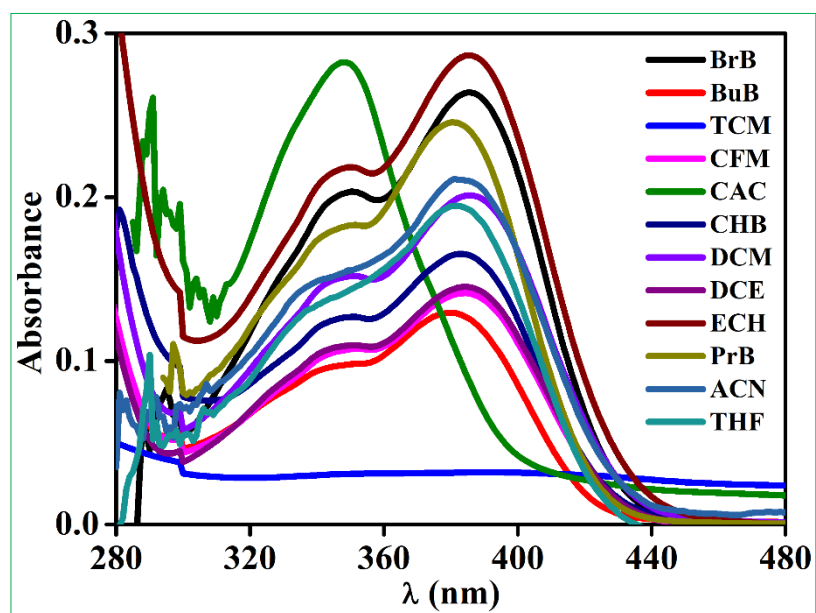

Fig. S4. UV-visible absorption spectra of TBNap in different organic solvents.

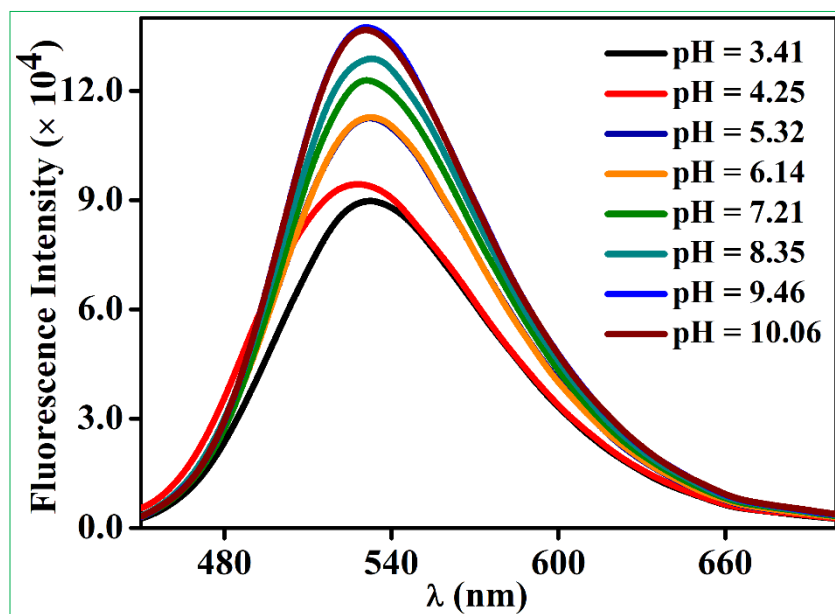

Fig. S5. The fluorescence emission spectra of TBNap were measured at different pH.

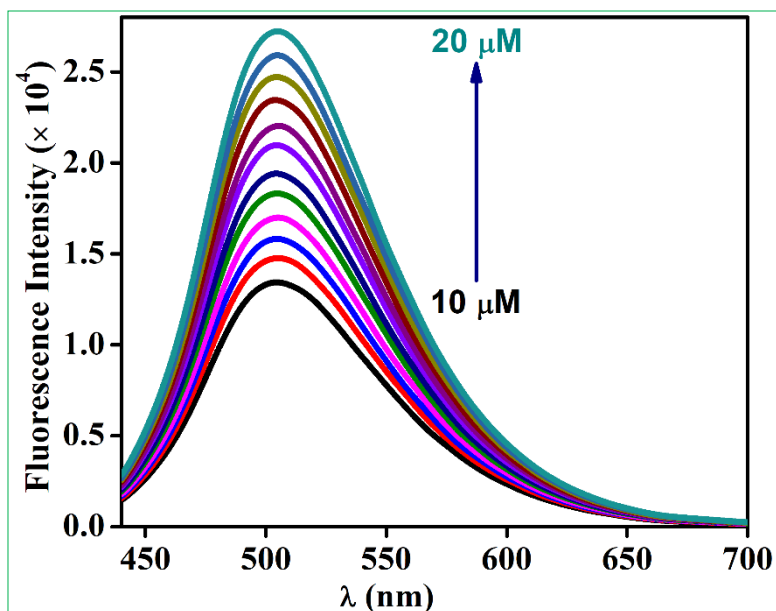

Fig. S6. Graph showing the concentration-dependent fluorescence emission studies.

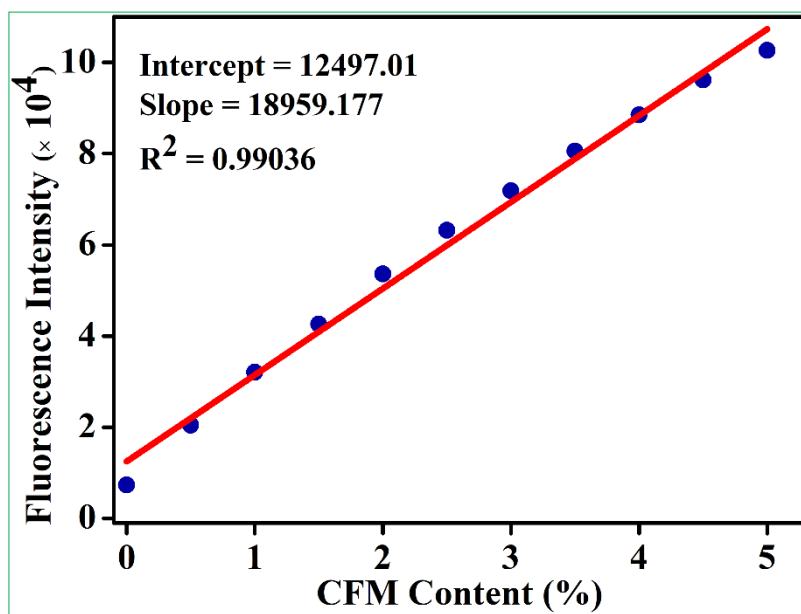

Fig. S7. A plot of fluorescence emission intensity vs. volume percentage of chloroform showing a linear curve.

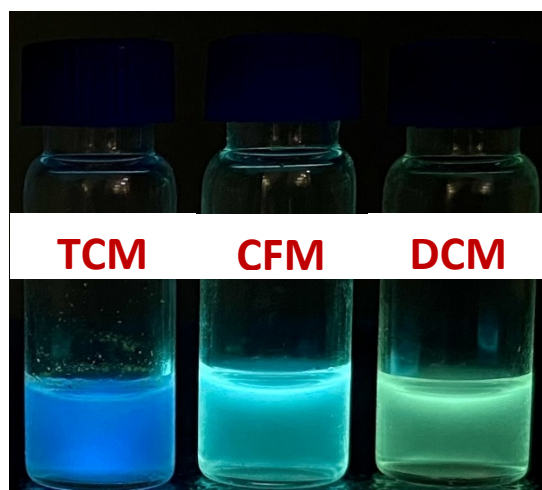

**Fig. S8.** The photograph of the visual color change for **TBNap** was imaged in TCE, CFM, and DCM solvents under UV-light irradiation.

**Table S1.** The measured emission maxima ( $\lambda_{\text{max}}$ ) and quantum yield of **TBNap** in the selected different organic solvents and the dielectric constant for different solvents.

| Solvents | Emission Maxima | Quantum Yield ( $\Phi$ ) | Dielectric Constant |
|----------|-----------------|--------------------------|---------------------|
| CAC      | 436             | 0.0459                   | -                   |
| TCM      | 480             | 0.576                    | 2.24                |
| CFM      | 488             | 4.15                     | 4.81                |
| CHB      | 489             | 2.125                    | 7.92                |
| DCM      | 501             | 2.728                    | 8.93                |
| DCE      | 506             | 1.823                    | 10.36               |
| ECH      | 519             | 0.976                    | 22.6                |
| BrB      | 492             | 2.89                     | 5.39                |
| BuBr     | 486             | 2.338                    | 6.93                |
| PrBr     | 490             | 3.412                    | 8.08                |
| THF      | 507             | 0.978                    | 7.58                |
| ACN      | 530             | 0.262                    | 37.5                |
